# Supplementary material for: Functional role of Tet-mediated RNA hydroxymethylcytosine in mouse ES cells and during differentiation
Source: PubMed Central journal article supplement (PMC7532169; doi:10.1038/s41467-020-18729-6), 2020-10-02
Supplement: 41467_2020_18729_MOESM4_ESM.pdf [file 41467_2020_18729_MOESM4_ESM.pdf]

## **Description of Additional Supplementary Files**

**Supplementary Data 1. List of enriched hMeRIP-Seq peaks in WT ESC.**

**Supplementary Data 2. List of ratio of spliced to unspliced transcripts bearing intronic 5hmC in WT ESC and TKO ESC.**

**Supplementary Data 3. List of differential hMeRIP-Seq peaks between WT ESC and EB.**

**Supplementary Data 4. List of differential hMeRIP-Seq peaks between WT ESC and TKO ESC.**

**Supplementary Data 5. List of enriched RIP-Seq transcripts in tagged-Tet1, -Tet2 and -Tet2 $\Delta$ ARBD ESCs.**

**Supplementary Data 6. List of differential hMeRIP-Seq peaks between tagged-Tet2 WT and -Tet2 $\Delta$ ARBD ESCs.**

**Supplementary Data 7. List of differentially expressed mRNAs between WT ESC and TKO ESC identified by RNA-Seq after transcription inhibition.**

**Supplementary Data 8. List of primers and oligos used for RT-qPCR, genotyping, Crispr-gRNA and plasmid cloning.**
